# Supplementary material
Source: PubMed Central journal article supplement (PMC2652244)

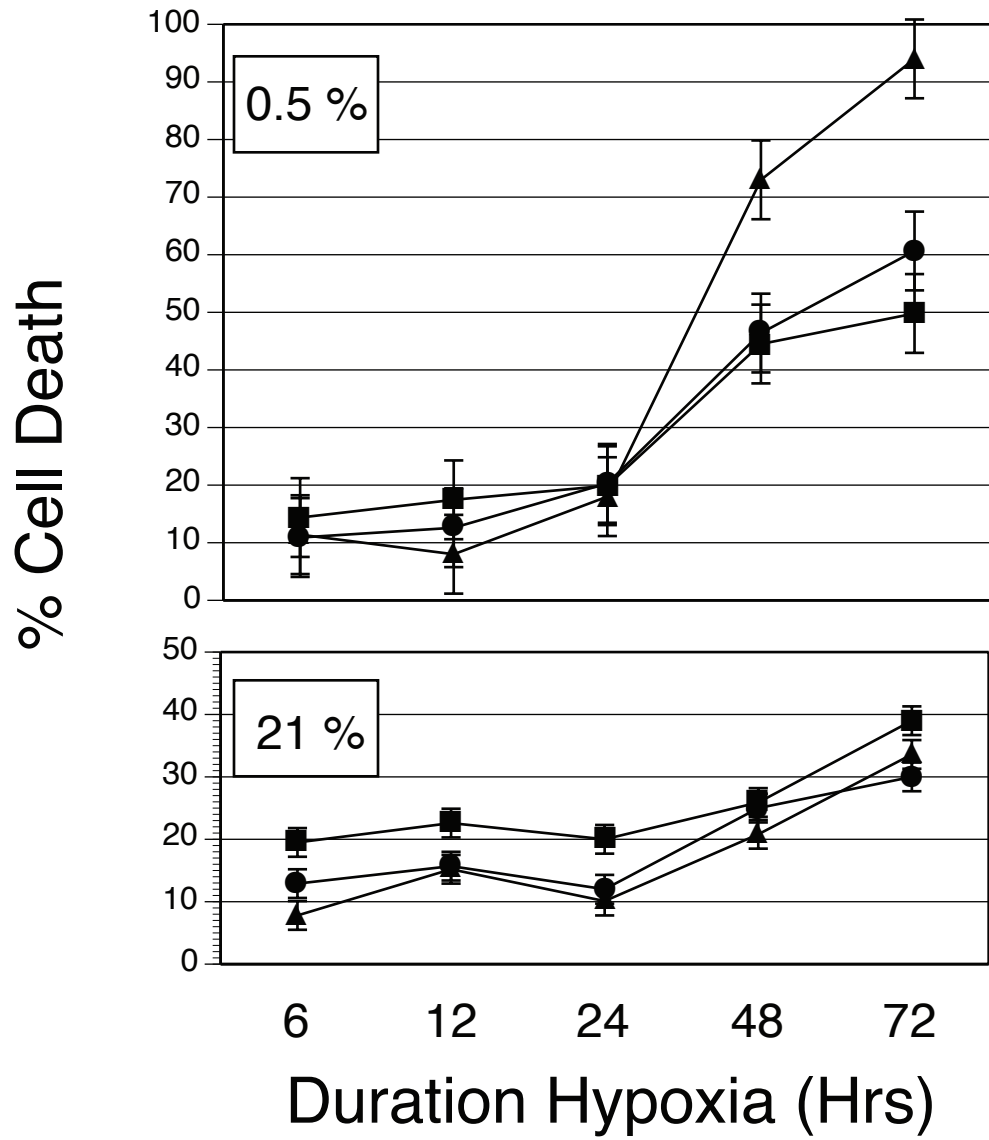

Supplement: NIHMS94620-supplement-S1.pdf [file NIHMS94620-supplement-S1.pdf]
